# Supplementary material
Source: PubMed Central journal article supplement (PMC7604091)
Supplement: mmc1.pdf [file mmc1.pdf]

**Supplementary material for:**

**Decrease of mobility, electricity demand, and NO<sub>2</sub> emissions on COVID-19 times and their feedback on prevention measures**

Asiel N. Corpus-Mendoza<sup>a,b,\*</sup>, Hector S. Ruiz-Segoviano<sup>a</sup>, Sergio F. Rodríguez-Contreras<sup>a</sup>, David Yañez-Dávila<sup>a</sup>, Araceli Hernández-Granados<sup>c</sup>.

<sup>a</sup> *Instituto de Energías Renovables – Universidad Nacional Autónoma de México, Privada Xochicalco S/N, 62580 Temixco, México.*

<sup>b</sup> *CONACYT – Universidad Nacional Autónoma de México, Privada Xochicalco S/N, 62580 Temixco, México.*

<sup>c</sup> *Instituto de Ciencias Físicas, Universidad Nacional Autónoma de México, Av. Universidad 2001, Chamilpa 62210, Cuernavaca, México.*

\* Corresponding author: [ancm@ier.unam.mx](mailto:ancm@ier.unam.mx)

Change in mobility of people in transit stations by country

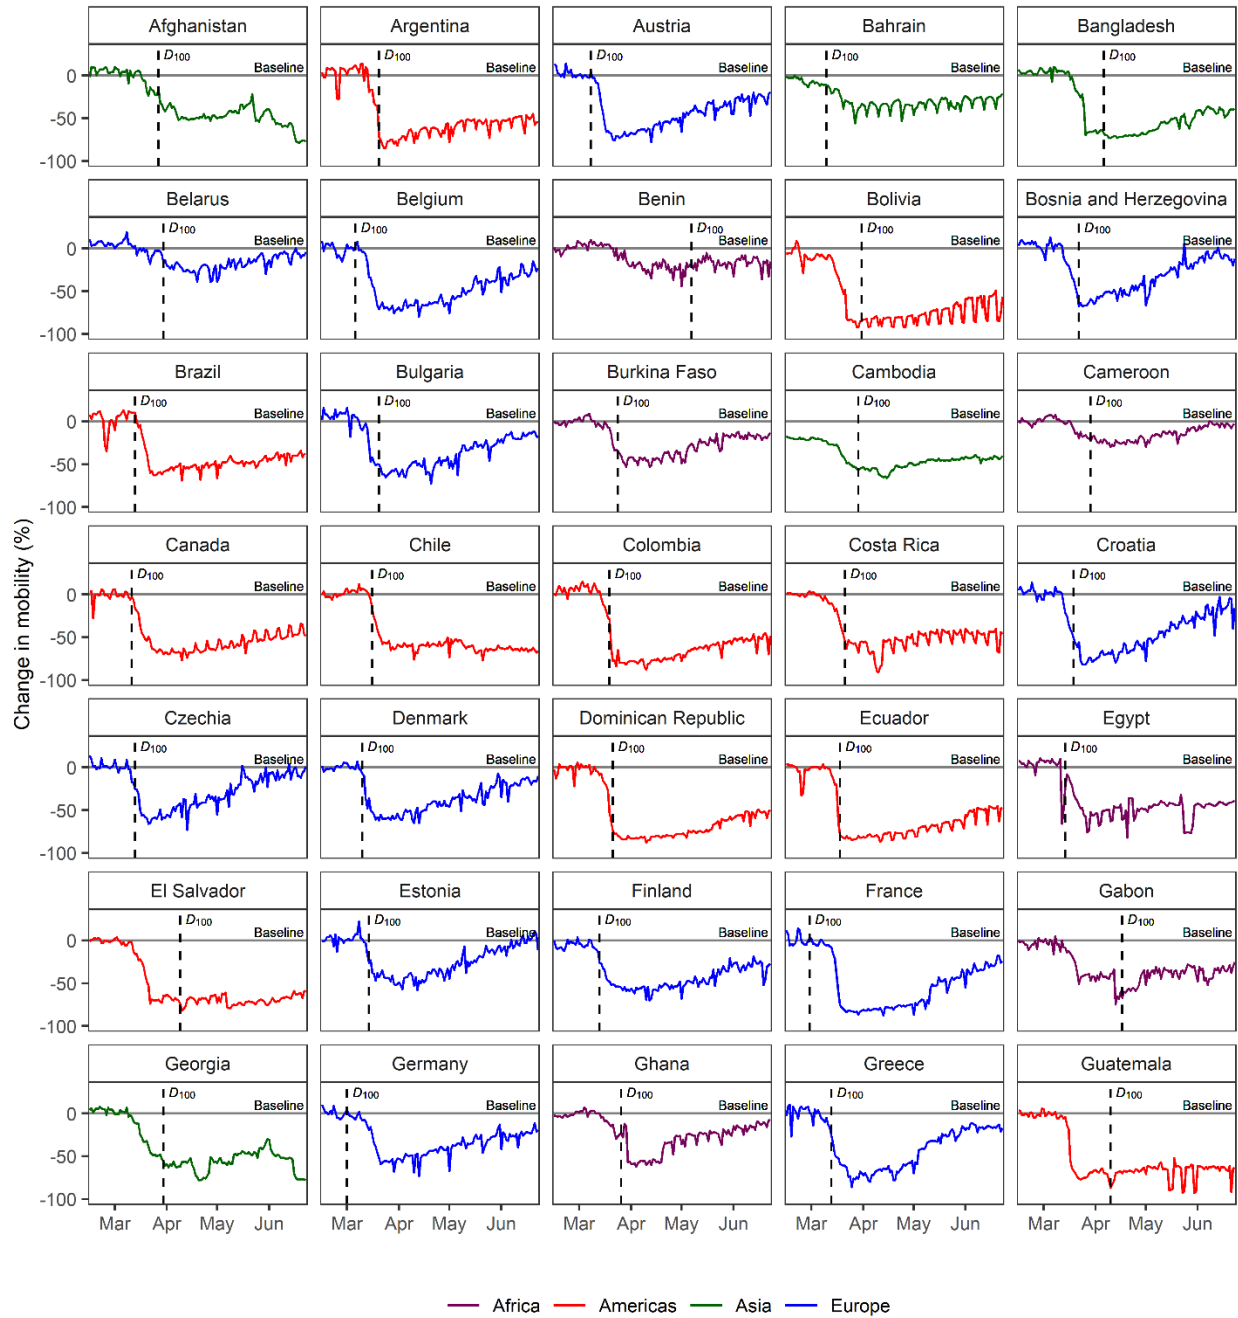

Fig. S1a. Change in mobility of people in transit stations by country.

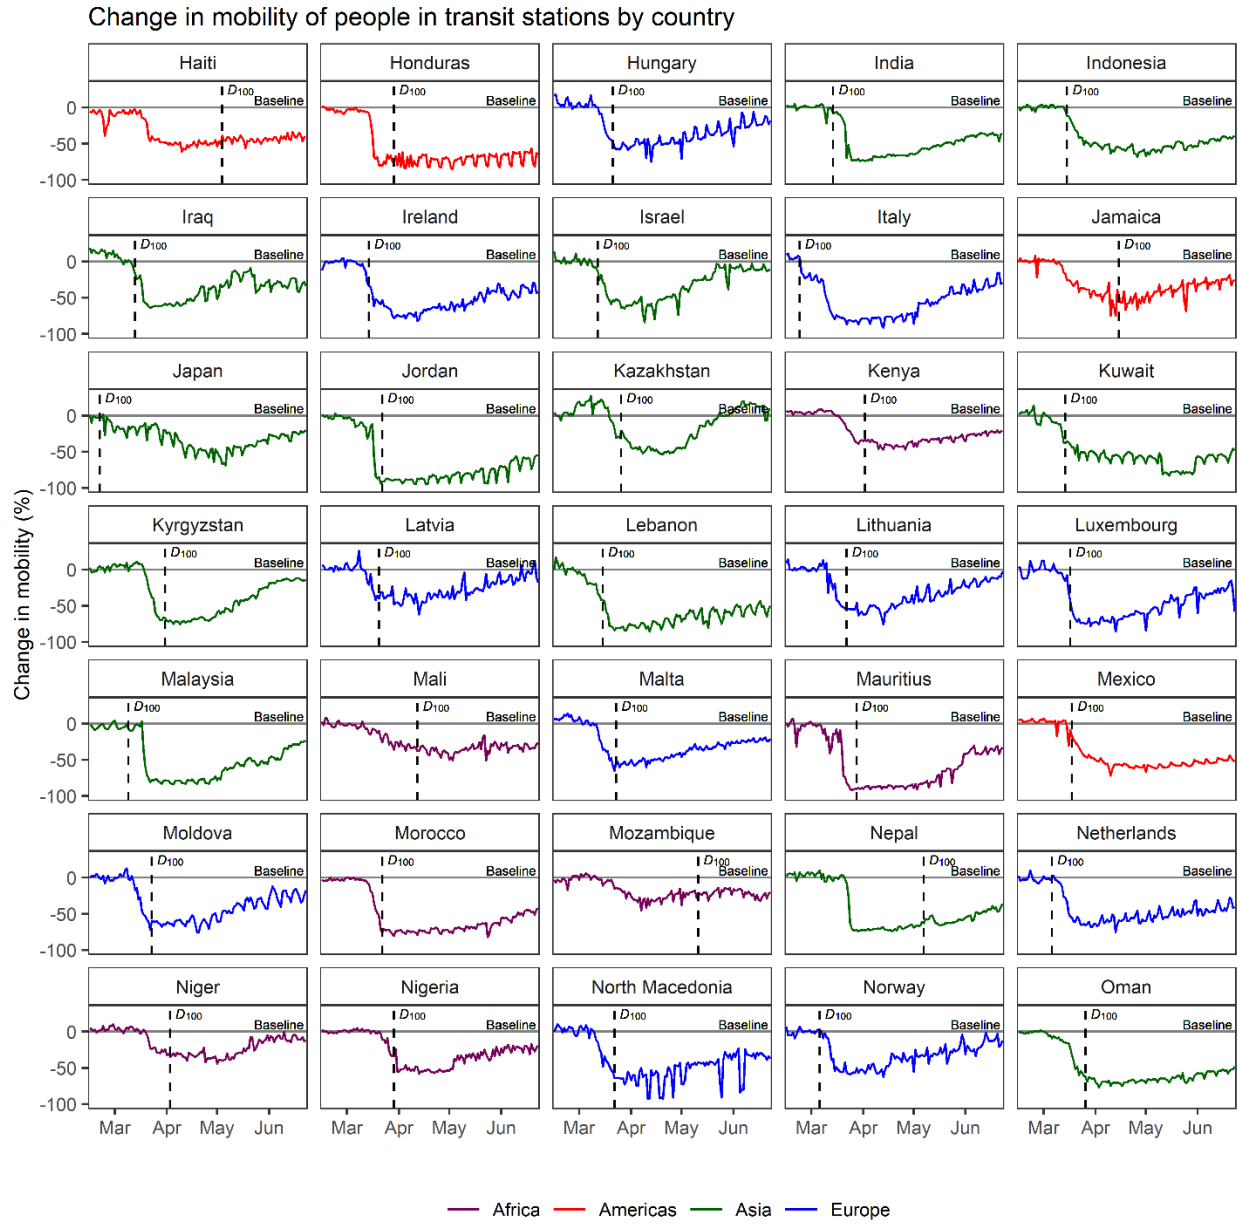

**Fig. S1b.** Change in mobility of people in transit stations by country.

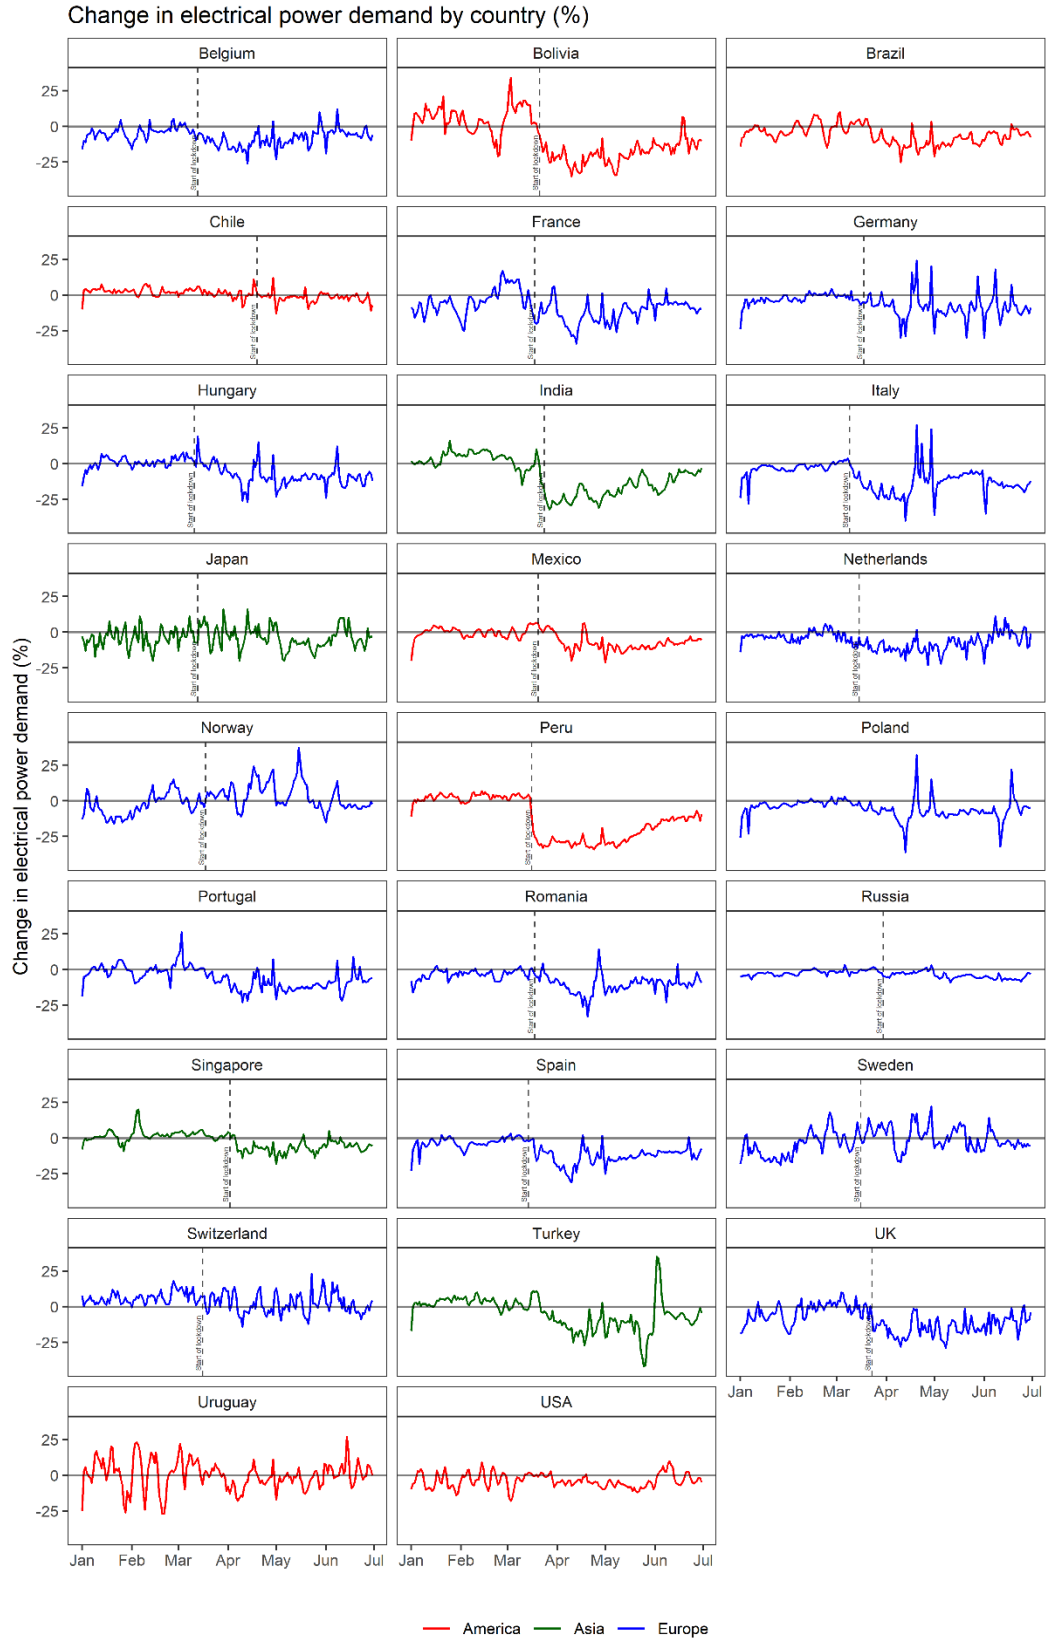

**Fig. S2.** Change in electrical power demand by country.

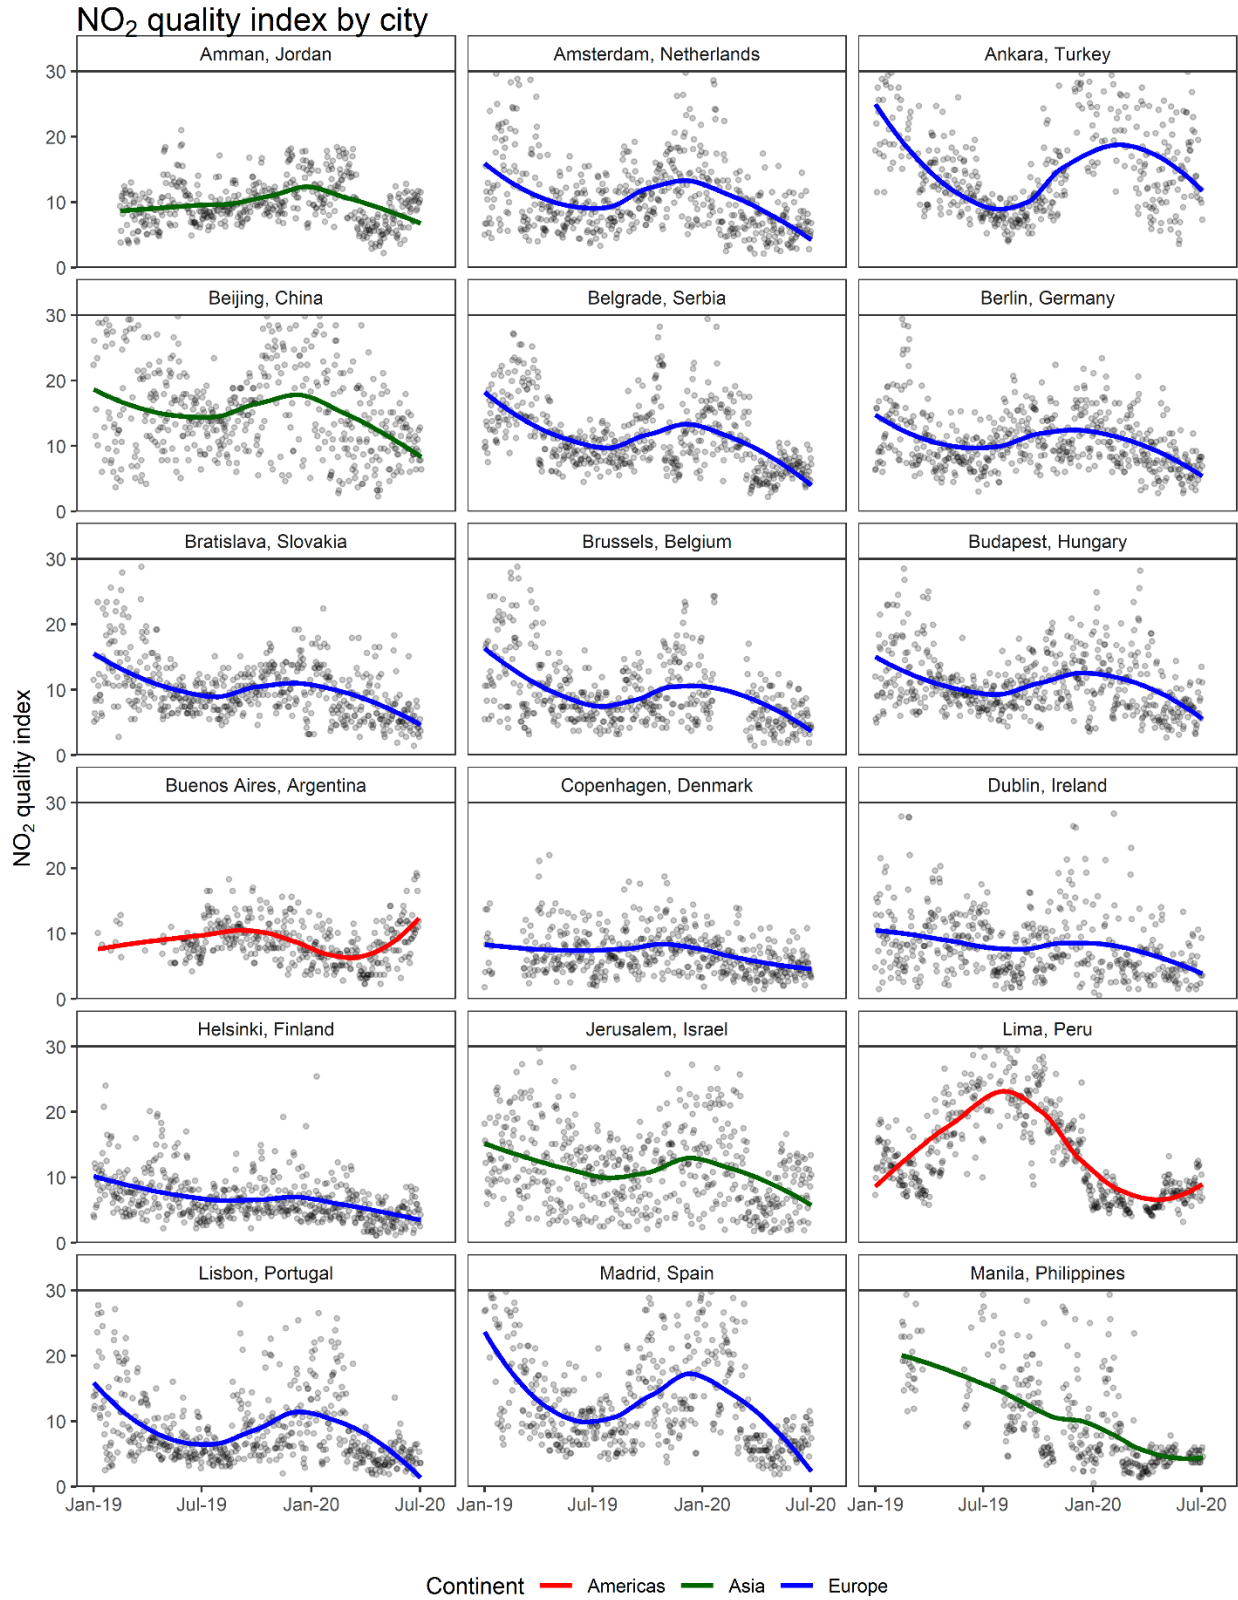

**Fig. S3a.** Change in NO<sub>2</sub> quality index by city.

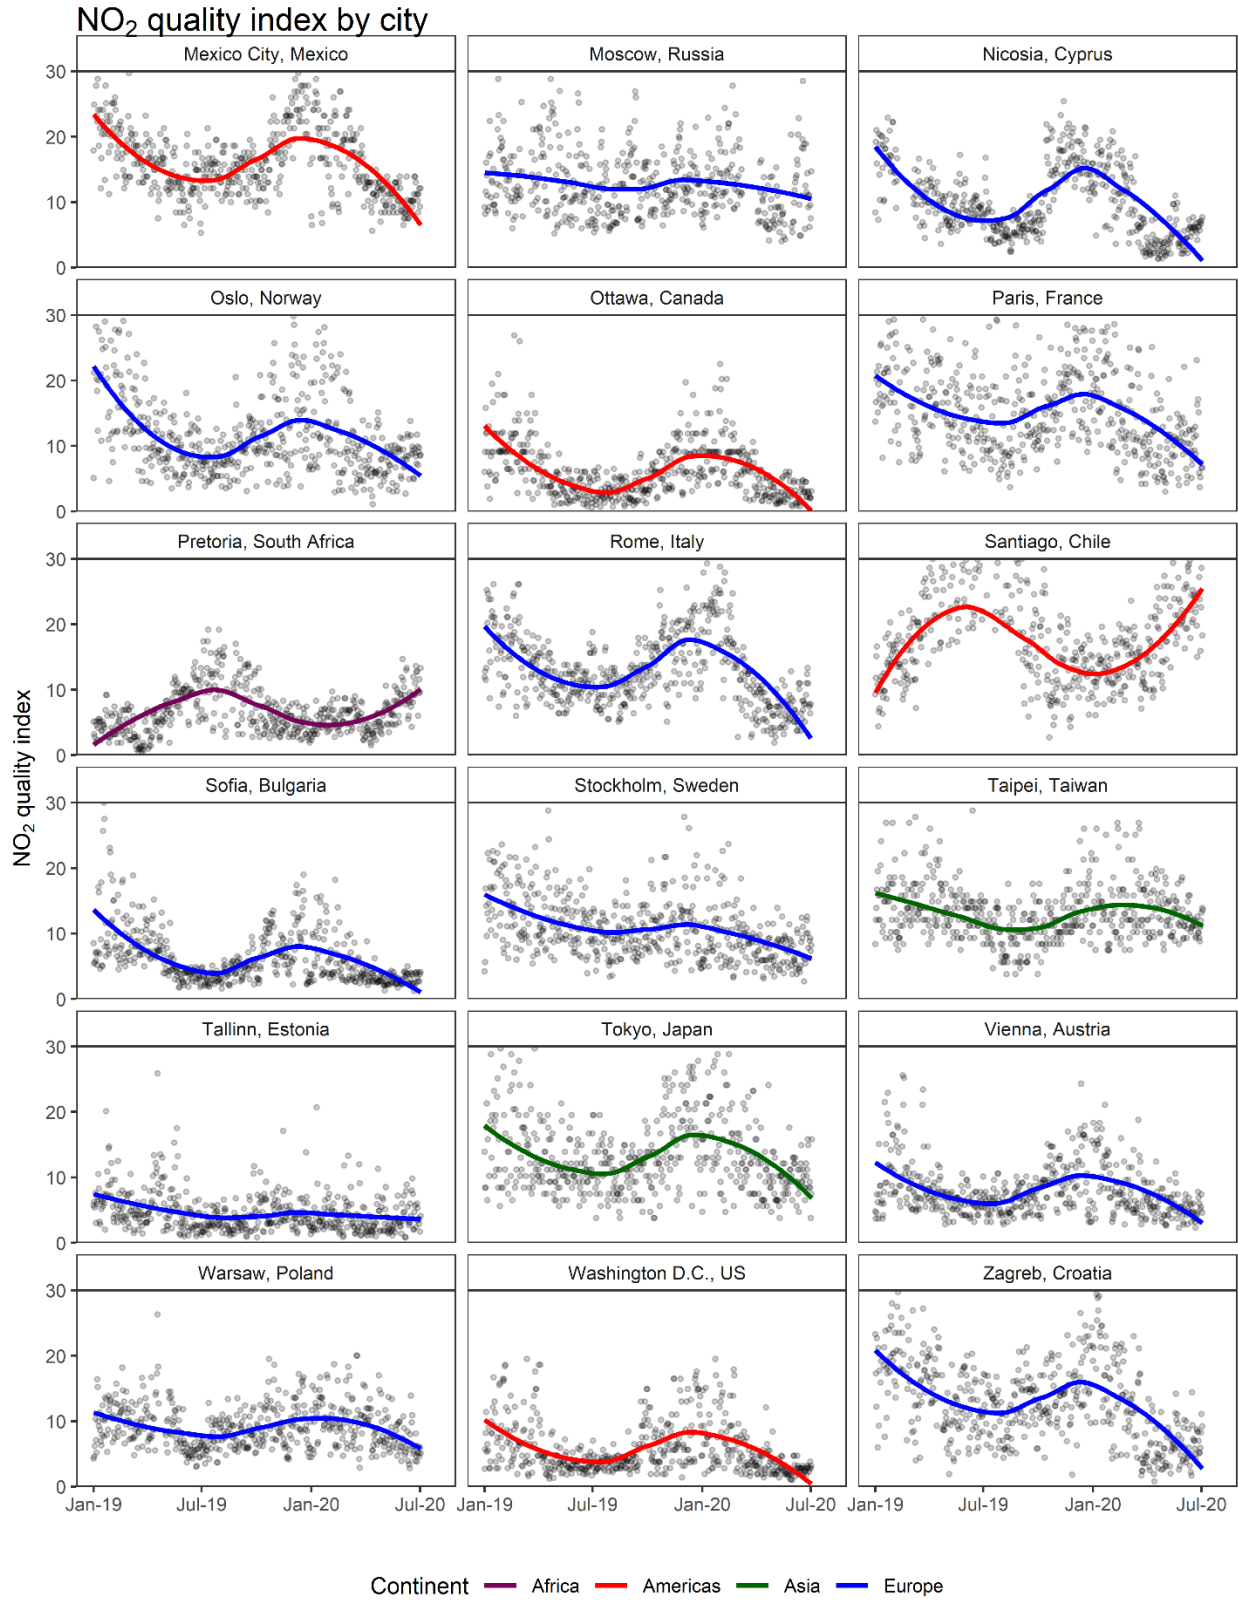

**Fig. S3b.** Change in NO<sub>2</sub> quality index by city.
